# Supplementary material
Source: publisher site journal article supplement (https://www.degruyterbrill.com/publication/isbn/9783110254723/downloadAsset/9783110254723_Inhaltsverzeichnis.pdf)
Supplement: Supplementary file 1 [file 9783110254723_Inhaltsverzeichnis.pdf]

# Inhalt

|                                                       |   |
|-------------------------------------------------------|---|
| Heidrun Kämper / Joachim Scharloth / Martin Wengeler: |   |
| Einleitung.....                                       | 1 |

## 1968 UND DIE FOLGEN

### Sprachanalytische Perspektiven

|                                                                                                                                                                        |    |
|------------------------------------------------------------------------------------------------------------------------------------------------------------------------|----|
| Joachim Scharloth: Von der Informalität zum <i>doing buddy</i> .<br>„1968“ in der Sprachgeschichte des Deutschen.....                                                  | 27 |
| Martin Wengeler: „Der Angriff auf das Bestehende“.<br>Zur Erinnerungskultur an „1968“ in deutschen Printmedien<br>am Beispiel des SPIEGEL.....                         | 55 |
| Nicole Müller: „Alltagsroutine gibt es bei uns nicht!“<br>Zum Verhältnis von Sprachwandel und Gesellschaftskritik<br>am Beispiel des <i>Recruiting</i> -Diskurses..... | 83 |

## DIE MEDIEN DES PROTESTS

### Flugblätter, Wandzeitungen, Lieder, Körper und kommunikative Gattungen

|                                                                                                                                                                 |     |
|-----------------------------------------------------------------------------------------------------------------------------------------------------------------|-----|
| Thomas Niehr: „Still schäm‘ ich mich in meiner Zelle,<br>Fritz Teufel, Ausgeburt der Hölle.“ Sprachreflexive<br>Elemente in den Flugblättern der Kommune I..... | 115 |
| Peter Zaugg: Die Zürcher Untergrundzeitschrift „Hotcha!“ –<br>Subkultureller Stil im multimodalen Text.....                                                     | 135 |

|                                                                                                                                                               |     |
|---------------------------------------------------------------------------------------------------------------------------------------------------------------|-----|
| Kersten Sven Roth: Das politische Liedermacherlied vor,<br>während und nach 1968 – zur Modellierung dynamischer<br>Textsorten-Diskurs-Relationen.....         | 163 |
| Angelika Linke: <i>Unordentlich, langhaarig und mit der Matratze<br/>auf dem Boden</i> . Zur Protestsemiotik von Körper und Raum<br>in den 1968er Jahren..... | 201 |
| Nina Verheyen: Distinktion durch Diskussion. 1968 und<br>die sozialen Folgen verbaler Interaktion.....                                                        | 227 |
| Monika Schnoz: Die Wandzeitungen des Sechstagerennens.<br>Zur kommunikativen Funktion eines alternativen Mediums.....                                         | 245 |

## KRITISCHE SEMANTIK

### Diskursanalytische Perspektiven auf begrifflich-ideologische Konstruktionen

|                                                                                                                                                                                                                                         |     |
|-----------------------------------------------------------------------------------------------------------------------------------------------------------------------------------------------------------------------------------------|-----|
| Heidrun Kämper: Der Faschismus-Diskurs 1967/68.<br>Semantik und Funktion.....                                                                                                                                                           | 259 |
| Jörg Kilian: Gewaltsamkeiten. Studenten, ihre Sprache und<br>die Eskalation eines Themas zwischen akademischem<br>Diskurs und Straßenkampf.....                                                                                         | 287 |
| Dietz Bering: Die 68er – anti-intellektuelle Intellektuelle?.....                                                                                                                                                                       | 307 |
| Andreas Rothenhöfer: „Jenes knisternde Vietnamgefühl...“<br>Perspektivischer Internationalismus und globalisierter<br>Politjargon im deutschen und amerikanischen Protestdiskurs.....                                                   | 335 |
| Olaf Gätje: Zur Metaphorik akademischer und avantgardistischer<br>Sprachkritik um 1968 oder das Bemühen, „eindimensionale<br>Denk- und Sprachformen aufzusprengen und die<br>Vieldimensionalität konkreter Wirklichkeit zu zeigen“..... | 357 |

**LINGUISTISCHE PERSPEKTIVEN AUF DEN DEUTSCHEN  
TERRORISMUS**

|                                                                                                                               |     |
|-------------------------------------------------------------------------------------------------------------------------------|-----|
| Martin Steinseifer: Die RAF als Medienereignis –<br>visuelle und sprachliche Inszenierungen.....                              | 375 |
| Andreas Musolff: Die RAF als „Hitler’s children“? – Öffentlicher<br>Terrorismus-Diskurs und „Vergangenheitsbewältigung“ ..... | 399 |
